# Supplementary material for: Investigating In Vitro and Ex Vivo Properties of Artemether/Lumefantrine Double-Fixed Dose Combination Lipid Matrix Tablets Prepared by Hot Fusion
Source: MDPI journal article supplement (doi:10.3390/pharmaceutics13070922), 2021-06-22
Supplement: s1 [file s1]

# Supplementary Materials: Investigating In Vitro and Ex Vivo Properties of Artemether/Lumefantrine Double-Fixed Dose Combination Lipid Matrix Tablets Prepared by Hot Fusion

Christi A. Wilkins, Lissinda H. du Plessis and Joe M. Viljoen

## S1. Physical Properties of the Different Lipid Matrix Tablet Formulations Analyzed

During preformulation studies, it was concluded that neither RetaLac® (R) nor Pharmacel® 101 (P) were suitable filler options for the manufacture of lipid matrix tablets as neither produced lipid matrix tablets with the necessary physical tablet characteristics to meet the test criteria utilizing the given factors of this study. It is important to note that whilst glycerol monostearate and stearic acid formulations containing either RetaLac® or Pharmacel® 101 produced poor tablets, cetyl alcohol in combination with these fillers produced no tablets, indicating that neither are viable lipid base-filler combinations.

All Pharmacel® 101 containing formulations, irrespective of the lipid base, experienced incomplete filling of the tablet die during tableting. This in turn resulted in relatively high percentage relative standard deviations (%RSDs) during mass variation trials (Table A2). From Table A3, it is clear that Pharmacel® 101 depicted the highest %RSD for mass variation (3.758%) followed by RetaLac® (2.708%). Formulation SA0.5P1.25 portrayed the highest percentage friability of 77.85% (Table A2) and only 3 of the 18 Pharmacel® 101 formulations, namely GM0.75P1, GM1P1.25 and SA0.75P1, met the friability criteria. Pharmacel® 101 produced tablets with markedly low tensile strength, on average 0.309 N.mm<sup>-2</sup>, and several tablet formulations (disregarding the lipid base or lipid:drug ratio) crumbled upon handling. Many of these lipid matrix tablets were too soft to obtain any hardness or tensile strength results and subsequently no clear conclusions could be drawn.

RetaLac® formulations depicted the second highest %RDS during mass variation assessment (2.708%) as well as the lowest average tensile strength (0.172 N.mm<sup>-2</sup>). RetaLac® lipid matrix tablets portrayed an average friability of 12.460%, with GM0.5R1.25 demonstrating the highest friability (76.022%). Unfortunately, despite RetaLac® formulations passing the disintegration tests and forming a gel matrix system, the lack of appropriate tablet properties such as hardness and friability, resulted in its inability to produce lipid matrix tablets of suitable integrity, rendering it inappropriate for further investigation.

It was furthermore observed that when all the factors were considered and the averages calculated per factor (Table A3), the poor results of RetaLac® and Pharmacel® 101 lipid matrix tablet formulations were skewing the overall data obtained. Therefore, a fair and accurate comparison could not be conducted. For this reason, these fillers were excluded from the main reporting.

The inclusion of magnesium stearate at the two levels of 1% and 1.25% did not produce a substantial difference in results between formulations containing MicroceLac® 100 and CombiLac® as seen in Table 2 in article text. The higher level (1.25%) was however necessary during the production of formulations containing RetaLac® and Pharmacel® 101, as it reduced tablet adherence to the punches during tableting and yielded more aesthetically appealing tablets overall. The influence of lubricant concentration on these formulations is clearly demonstrated in Figure B4.

**Table S1.** Average values obtained for the physical properties (mass variation presented as %RSD in parenthesis) of the lipid matrix tablet formulations containing either MicroceLac® or CombiLac® as filler. Values highlighted and in bold indicate that the formulation did not adhere to the criteria for the specific experiment.

|             | Test       | Unit              | Stearic acid (SA)  |        |        | Glycerol monostearate (GM) |        |        | Cetyl alcohol (CA) |        |        |
|-------------|------------|-------------------|--------------------|--------|--------|----------------------------|--------|--------|--------------------|--------|--------|
|             |            |                   | 0.5:1              | 0.75:1 | 1:1    | 0.5:1                      | 0.75:1 | 1:1    | 0.5:1              | 0.75:1 | 1:1    |
|             |            |                   |                    |        |        |                            |        |        |                    |        |        |
| MicroceLac® | 1% MgSt    | Mass variation    | (0.91)             | (1.15) | (0.85) | (1.47)                     | (1.94) | (0.92) | (1.55)             | (1.85) | (1.89) |
|             |            | Friability        | 0.153              | 0.121  | 0.122  | 0.143                      | 0.180  | 0.136  | 0.997              | 0.998  | 0.999  |
|             |            | Crushing strength | 218.9              | 132.3  | 140.6  | 162.6                      | 143.7  | 155.0  | 157.8              | 182.5  | 185.8  |
|             |            | Tensile strength  | N.mm <sup>-2</sup> | 2.393  | 1.351  | 1.464                      | 1.856  | 1.515  | 1.738              | 1.863  | 2.169  |
|             |            | Disintegration    | min                | ND     | ND     | ND                         | ND     | ND     | ND                 | ND     | ND     |
|             | 1.25% MgSt | Mass variation    | (0.94)             | (0.87) | (0.72) | (1.14)                     | (1.73) | (1.31) | (1.96)             | (2.04) | (1.49) |
|             |            | Friability        | 0.181              | 0.121  | 0.101  | 0.100                      | 0.162  | 0.226  | 0.994              | 0.998  | 0.995  |
|             |            | Crushing strength | N                  | 244.5  | 159.6  | 129.3                      | 156.1  | 140.4  | 160.6              | 162.2  | 179.2  |
|             |            | Tensile strength  | N.mm <sup>-2</sup> | 2.859  | 1.693  | 1.372                      | 1.785  | 1.540  | 1.903              | 1.992  | 2.071  |
|             |            | Disintegration    | min                | ND     | ND     | ND                         | ND     | ND     | ND                 | ND     | ND     |
| CombiLac®   | 1% MgSt    | Mass variation    | (2.30)             | (0.98) | (0.71) | (1.74)                     | (1.47) | (1.06) | (1.71)             | (1.61) | (1.29) |
|             |            | Friability        | 0.234              | 0.060  | 0.800  | 0.114                      | 0.040  | 0.181  | 0.998              | 0.999  | 0.999  |
|             |            | Crushing strength | N                  | 257.8  | 145.3  | 172.2                      | 153.4  | 170.0  | 150.1              | 176.9  | 162.0  |
|             |            | Tensile strength  | N.mm <sup>-2</sup> | 2.886  | 1.532  | 1.817                      | 1.563  | 1.854  | 1.521              | 2.073  | 3.259  |
|             |            | Disintegration    | min                | ND     | ND     | ND                         | ND     | 10.68  | 14.13              | ND     | ND     |
|             | 1.25% MgSt | Mass variation    | (1.02)             | (0.92) | (0.74) | (8.28)                     | (0.71) | (1.04) | (1.83)             | (1.66) | (1.75) |
|             |            | Friability        | 0.283              | 0.183  | 0.243  | 0.313                      | 0.297  | 0.612  | 0.998              | 0.998  | 0.996  |
|             |            | Crushing strength | N                  | 244.6  | 224.7  | 151.8                      | 86.8   | 164.6  | 151.6              | 165.4  | 177.9  |
|             |            | Tensile strength  | N.mm <sup>-2</sup> | 2.874  | 2.535  | 1.601                      | 0.928  | 1.810  | 1.705              | 1.931  | 2.114  |
|             |            | Disintegration    | min                | ND     | 13.40  | ND                         | ND     | ND     | 14.44              | ND     | ND     |

**Table S2.** Average values obtained for the physical properties (mass variation presented as %RSD in parenthesis) of the lipid matrix tablet formulations containing either PharmaceLac®101 or RetaLac® as filler. Values highlighted and in bold indicate that the formulation did not adhere to the criteria for the specific experiment.

|                 | Test       | Unit              | Stearic acid (SA)  |        |        | Glycerol monostearate (GM) |        |        | Cetyl alcohol (CA) |        |     |
|-----------------|------------|-------------------|--------------------|--------|--------|----------------------------|--------|--------|--------------------|--------|-----|
|                 |            |                   | 0.5:1              | 0.75:1 | 1:1    | 0.5:1                      | 0.75:1 | 1:1    | 0.5:1              | 0.75:1 | 1:1 |
|                 |            |                   |                    |        |        |                            |        |        |                    |        |     |
| PharmaceLac®101 | 1% MgSt    | Mass variation    | (3.77)             | (1.22) | (2.88) | (1.71)                     | (3.67) | (4.18) | NR                 | NR     | NR  |
|                 |            | Friability        | 57.73              | 3.682  | 10.722 | 1.218                      | 0.552  | 0.521  |                    |        |     |
|                 |            | Crushing strength | 0                  | 20.600 | 15.400 | 38.700                     | 49.700 | 67.100 |                    |        |     |
|                 |            | Tensile strength  | N.mm <sup>-2</sup> | 0      | 0.152  | 0.116                      | 0.347  | 0.457  |                    |        |     |
|                 |            | Disintegration    | min                | 0.59   | 0.56   | 2.04                       | 0.36   | 0.26   |                    |        |     |
|                 | 1.25% MgSt | Mass variation    | (7.66)             | (2.62) | (2.23) | (6.03)                     | (7.28) | (1.85) | NR                 | NR     | NR  |
|                 |            | Friability        | 77.85              | 0.429  | 1.869  | 10.127                     | 2.319  | 0.269  |                    |        |     |
|                 |            | Crushing strength | N                  | 0      | 43.200 | 26.000                     | 27.111 | 69.625 |                    |        |     |
|                 |            | Tensile strength  | N.mm <sup>-2</sup> | 0      | 0.374  | 0.193                      | 0.206  | 0.514  |                    |        |     |
|                 |            | Disintegration    | min                | 0.55   | 0.64   | 1.08                       | 0.34   | 0.61   |                    |        |     |
| RetaLac®        | 1% MgSt    | Mass variation    | (1.07)             | (1.91) | (1.67) | (4.11)                     | (2.37) | (6.44) | NR                 | NR     | NR  |
|                 |            | Friability        | 3.149              | 3.149  | 1.127  | 12.487                     | 10.322 | 1.005  |                    |        |     |
|                 |            | Crushing strength | N                  | 36.800 | 19.100 | 26.800                     | 0      | 13.286 |                    |        |     |
|                 |            | Tensile strength  | N.mm <sup>-2</sup> | 0.333  | 0.147  | 0.202                      | 0      | 0.079  |                    |        |     |
|                 |            | Disintegration    | min                | ND     | ND     | ND                         | ND     | ND     |                    |        |     |
|                 | 1.25% MgSt | Mass variation    | (1.50)             | (1.30) | (3.15) | (4.44)                     | (1.65) | (2.88) | NR                 | NR     | NR  |
|                 |            | Friability        | 10.822             | 10.822 | 1.840  | 76.022                     | 14.653 | 4.118  |                    |        |     |
|                 |            | Crushing strength | N                  | 27.700 | 21.900 | 25.800                     | 0      | 12.667 |                    |        |     |
|                 |            | Tensile strength  | N.mm <sup>-2</sup> | 0.232  | 0.173  | 0.203                      | 0      | 0.093  |                    |        |     |
|                 |            | Disintegration    | min                | ND     | ND     | ND                         | ND     | ND     |                    |        |     |

MgSt = Magnesium stearate; ND = Non-disintegrating; NR = No Results.

**Table S3.** Comparison of all formulation factors, including RetaLac® and Pharmacel®101 fillers, investigated in the full factorial design regarding average mass variation, friability and tensile strength results to demonstrate the negative effect of these fillers on reporting.

| Factors               | Mass variation |       | Friability (%) | Crushing Strength |        | Tensile Strength      |       |
|-----------------------|----------------|-------|----------------|-------------------|--------|-----------------------|-------|
|                       | Mass (mg)      | %RSD  |                | (N)               | %RSD   | (N.mm <sup>-2</sup> ) | %RSD  |
| MicroceLac®100        | 494.939        | 1.390 | 0.429          | 165.406           | 19.611 | 1.850                 | 0.148 |
| RetaLac®              | 487.692        | 2.708 | 12.460         | 21.766            | 25.470 | 0.172                 | 0.278 |
| CombiLac®             | 494.533        | 1.710 | 0.519          | 170.556           | 20.400 | 1.978                 | 0.216 |
| Pharmacel® 101        | 497.804        | 3.758 | 13.941         | 36.628            | 24.828 | 0.309                 | 0.249 |
| Stearic Acid          | 499.783        | 1.027 | 0.217          | 93.014            | 24.490 | 2.031                 | 0.249 |
| Glycerol Monostearate | 498.592        | 1.912 | 0.209          | 103.538           | 25.886 | 1.613                 | 0.086 |
| Cetyl Alcohol         | 485.833        | 1.719 | 0.997          | 169.233           | 12.528 | 2.097                 | 0.211 |
| 0.5:1                 | 495.775        | 2.088 | 0.459          | 109.922           | 11.078 | 2.084                 | 0.142 |
| 0.75:1                | 496.500        | 1.411 | 0.430          | 115.866           | 27.746 | 1.923                 | 0.169 |
| 1:1                   | 491.930        | 1.158 | 0.534          | 111.614           | 21.192 | 1.735                 | 0.235 |
| MgSt 1%               | 497.130        | 1.411 | 0.460          | 112.118           | 20.497 | 1.914                 | 0.216 |
| MgSt 1.25%            | 492.339        | 1.694 | 0.489          | 112.816           | 19.514 | 1.914                 | 0.148 |

MgSt = Magnesium stearate; ND = Non-disintegrating.

## S2. Photographs of internal and external tablet morphologies for the various lipid matrix tablet formulations

**Table S4.** Abbreviations allocated to formulations.

| Abbreviation | Lipid                  | Lipid:drug ratio         | Filler          | Lubricant concentration  |
|--------------|------------------------|--------------------------|-----------------|--------------------------|
| SA0.5M1      | Stearic acid;          | 0.5:1 lipid:drug ratio;  | MicroceLac®100; | 1% Magnesium stearate    |
| SA0.5C1      | Stearic acid;          | 0.5:1 lipid:drug ratio;  | CombiLac®;      | 1% Magnesium stearate    |
| SA0.75M1     | Stearic acid;          | 0.75:1 lipid:drug ratio; | MicroceLac®100; | 1% Magnesium stearate    |
| SA0.75C1     | Stearic acid;          | 0.75:1 lipid:drug ratio; | CombiLac®;      | 1% Magnesium stearate    |
| SA1M1        | Stearic acid;          | 1:1 lipid:drug ratio;    | MicroceLac®100; | 1% Magnesium stearate    |
| SA1C1        | Stearic acid;          | 1:1 lipid:drug ratio;    | CombiLac®;      | 1% Magnesium stearate    |
| GM0.5M1      | Glycerol monostearate; | 0.5:1 lipid:drug ratio;  | MicroceLac®100; | 1% Magnesium stearate    |
| GM0.5C1      | Glycerol monostearate; | 0.5:1 lipid:drug ratio;  | CombiLac®;      | 1% Magnesium stearate    |
| GM0.75M1     | Glycerol monostearate; | 0.75:1 lipid:drug ratio; | MicroceLac®100; | 1% Magnesium stearate    |
| GM0.75C1     | Glycerol monostearate; | 0.75:1 lipid:drug ratio; | CombiLac®;      | 1% Magnesium stearate    |
| GM1M1        | Glycerol monostearate; | 1:1 lipid:drug ratio;    | MicroceLac®100; | 1% Magnesium stearate    |
| GM1C1        | Glycerol monostearate; | 1:1 lipid:drug ratio;    | CombiLac®;      | 1% Magnesium stearate    |
| CA0.5M1      | Cetyl alcohol;         | 0.5:1 lipid:drug ratio;  | MicroceLac®100; | 1% Magnesium stearate    |
| CA0.5C1      | Cetyl alcohol;         | 0.5:1 lipid:drug ratio;  | CombiLac®;      | 1% Magnesium stearate    |
| CA0.75M1     | Cetyl alcohol;         | 0.75:1 lipid:drug ratio; | MicroceLac®100; | 1% Magnesium stearate    |
| CA0.75C1     | Cetyl alcohol;         | 0.75:1 lipid:drug ratio; | CombiLac®;      | 1% Magnesium stearate    |
| CA1M1        | Cetyl alcohol;         | 1:1 lipid:drug ratio;    | MicroceLac®100; | 1% Magnesium stearate    |
| CA1C1        | Cetyl alcohol;         | 1:1 lipid:drug ratio;    | CombiLac®;      | 1% Magnesium stearate    |
| GM0.5P1      | Glycerol monostearate; | 0.5:1 lipid:drug ratio;  | Pharmacel®101;  | 1% Magnesium stearate    |
| GM0.5P1.25   | Glycerol monostearate; | 0.5:1 lipid:drug ratio;  | Pharmacel®101;  | 1.25% Magnesium stearate |
| GM0.75P1     | Glycerol monostearate; | 0.75:1 lipid:drug ratio; | Pharmacel®101;  | 1% Magnesium stearate    |
| GM0.75P1.25  | Glycerol monostearate; | 0.75:1 lipid:drug ratio; | Pharmacel®101;  | 1.25% Magnesium stearate |
| GM1P1        | Glycerol monostearate; | 1:1 lipid:drug ratio;    | Pharmacel®101;  | 1% Magnesium stearate    |
| GM1P1.25     | Glycerol monostearate; | 1:1 lipid:drug ratio;    | Pharmacel®101;  | 1.25% Magnesium stearate |
| GM0.75R1     | Glycerol monostearate; | 0.75:1 lipid:drug ratio; | RetaLac®;       | 1% Magnesium stearate    |
| GM0.75R1.25  | Glycerol monostearate; | 0.75:1 lipid:drug ratio; | RetaLac®;       | 1.25% Magnesium stearate |

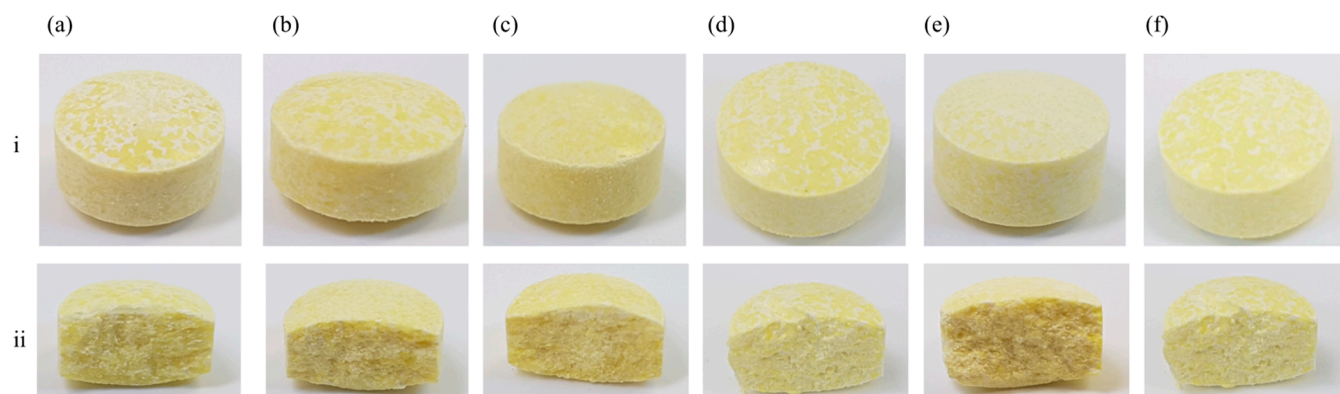

**Figure S1.** Morphology photographs showing (i) external and (ii) internal surfaces for formulations (a) SA0.5M1; (b) SA0.5C1; (c) SA0.75M1; (d) SA0.75C1; (e) SA1M1; and (f) SA1C1.

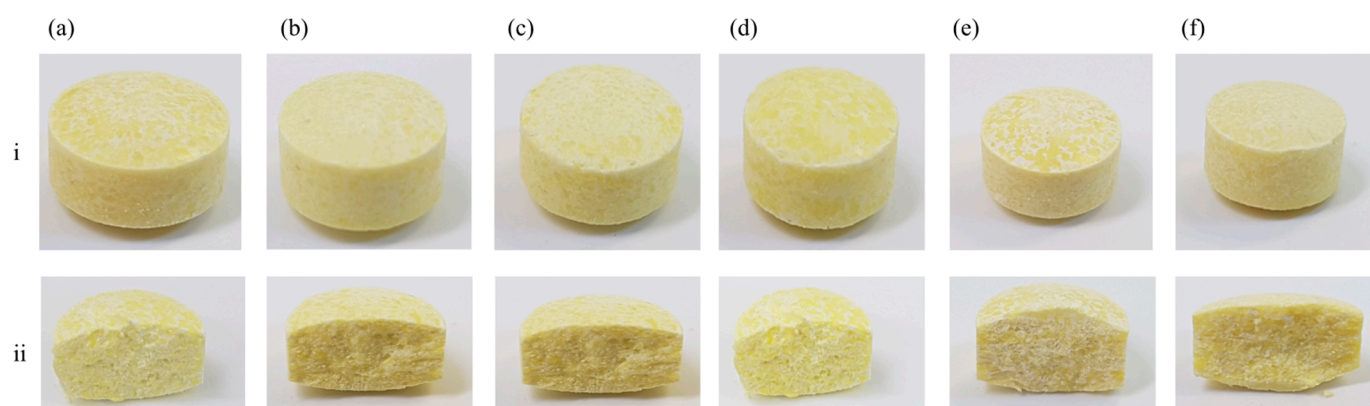

**Figure S2.** Morphology photographs showing (i) external and (ii) internal surfaces for formulations (a) GM0.5M1; (b) GM0.5C1; (c) GM0.75M1; (d) GM0.75C1; (e) GM1M1; and (f) GM1C1.

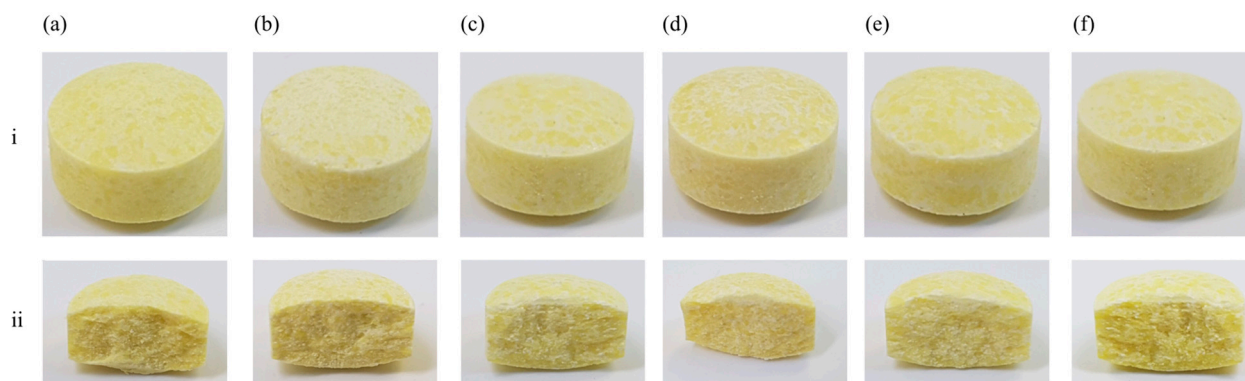

**Figure S3.** Morphology photographs showing (i) external and (ii) internal surfaces for formulations (a) CA0.5M1; (b) CA0.5C1; (c) CA0.75M1; (d) CA0.75C1; (e) CA1M1; and (f) CA1C1.

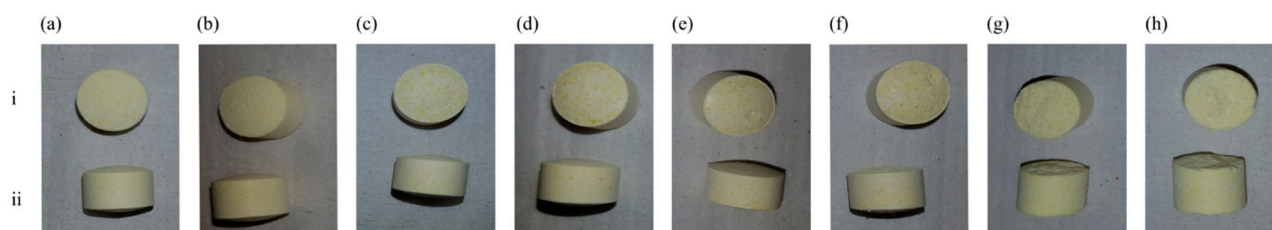

**Figure S4.** Morphology photographs showing (i) top view and (ii) side view of tablets for selected formulations (a) GM0.5P1; (b) GM0.5P1.25; (c) GM0.75P1; (d) GM0.75P1.25; (e) GM1P1; (f) GM1P1.25 (g) GM0.75R1 and (h) GM0.75R1.25; where P signifies Pharmace1<sup>®</sup>101 and R signifies RetaLac<sup>®</sup>.

### S3. Assay: Artemether and Lumefantrine Content Determined

ART and LUM content were tested per formulation. As described, the lipid matrix tablets were formulated to contain 120 mg LUM and 20 mg ART per tablet. The results pertaining to the assay experiments are recorded in Table C.1 and presented as the calculated %API content per formulation. Additionally, when considering lumefantrine formulations, it was seen to demonstrate a %RSD-value of 20.3% across all variables; whilst artemether displayed a %RSD-value of 27.1% across all investigated variables.

**Table S5.** %API content determined per formulation.

| %Artemether | Formulation | %Lumefantrine |
|-------------|-------------|---------------|
| 95.00       | SA1C1       | 93.20         |
| 78.54       | SA1M1       | 91.60         |
| 91.50       | SA0.5C1     | 105.46        |
| 100.56      | SA0.5M1     | 116.28        |
| 72.43       | SA0.75C1    | 131.72        |
| 75.34       | SA0.75M1    | 133.37        |
| 60.21       | GM1C1       | 72.79         |
| 104.20      | GM1M1       | 101.60        |
| 67.23       | GM0.5C1     | 74.74         |
| 100.77      | GM0.5M1     | 116.56        |
| 86.64       | GM0.75C1    | 98.15         |
| 82.66       | GM0.75M1    | 91.30         |
| 71.24       | CA1C1       | 86.16         |
| 65.67       | CA1M1       | 80.93         |
| 99.34       | CA0.5C1     | 112.54        |
| 126.10      | CA0.5M1     | 117.60        |
| 81.31       | CA0.75C1    | 92.94         |
| 79.92       | CA0.75M1    | 89.84         |

#### S4. Fit Factors: Indicating Similarities and Differences Between Tested Formulations

Table S6. Fit factors analyzed indicating statistically significant differences in green and similarities in red.

| Formulation |    | CA0.5<br>M1 | CA0.75<br>M1 | CA1M1 | CA0.5C<br>1 | CA0.75<br>C1 | CA1C1 | SA0.5M<br>1 | SA0.75<br>M1 | SA1M1 | SA0.5C<br>1 | SA0.75<br>C1 | SA1C1 | GM0.5<br>M1 | GM0.75<br>M1 | GM1M<br>1 | GM0.5<br>C1 | GM0.75<br>C1 | GM1C1 |
|-------------|----|-------------|--------------|-------|-------------|--------------|-------|-------------|--------------|-------|-------------|--------------|-------|-------------|--------------|-----------|-------------|--------------|-------|
| CA0.5M1     | f1 |             | 36.9         | 37.7  | 36.0        |              |       |             |              |       |             |              |       |             |              |           |             |              |       |
|             | f2 |             | 38.3         | 40.3  | 43.2        |              |       |             |              |       |             |              |       |             |              |           |             |              |       |
| CA0.75M1    | f1 | 36.9        |              | 83.4  |             | 44.0         |       |             |              |       |             |              |       |             |              |           |             |              |       |
|             | f2 | 38.3        |              | 30.0  |             | 42.3         |       |             |              |       |             |              |       |             |              |           |             |              |       |
| CA1M1       | f1 | 37.7        | 83.4         |       |             |              | 48.4  |             |              |       |             |              |       |             |              |           |             |              |       |
|             | f2 | 40.3        | 30.0         |       |             |              | 31.1  |             |              |       |             |              |       |             |              |           |             |              |       |
| CA0.5C1     | f1 | 36.0        |              |       |             | 4.6          | 37.3  |             |              |       |             |              |       |             |              |           |             |              |       |
|             | f2 | 43.2        |              |       |             | 82.2         | 40.6  |             |              |       |             |              |       |             |              |           |             |              |       |
| CA0.75C1    | f1 |             | 44.0         |       | 4.6         |              | 34.2  |             |              |       |             |              |       |             |              |           |             |              |       |
|             | f2 |             | 42.3         |       | 82.2        |              | 43.3  |             |              |       |             |              |       |             |              |           |             |              |       |
| CA1C1       | f1 |             |              | 48.4  | 37.3        | 34.2         |       |             |              |       |             |              |       |             |              |           |             |              |       |
|             | f2 |             |              | 31.1  | 40.6        | 43.3         |       |             |              |       |             |              |       |             |              |           |             |              |       |
| SA0.5M1     | f1 |             |              |       |             |              |       | 16.7        | 19.4         | 3.0   |             |              |       |             |              |           |             |              |       |
|             | f2 |             |              |       |             |              |       | 55.3        | 50.4         | 85.6  |             |              |       |             |              |           |             |              |       |
| SA0.75M1    | f1 |             |              |       |             |              | 16.7  |             | 16.1         |       | 18.7        |              |       |             |              |           |             |              |       |
|             | f2 |             |              |       |             |              | 55.3  |             | 58.7         |       | 56.1        |              |       |             |              |           |             |              |       |
| SA1M1       | f1 |             |              |       |             |              | 19.4  | 16.1        |              |       |             |              | 8.5   |             |              |           |             |              |       |
|             | f2 |             |              |       |             |              | 50.4  | 58.7        |              |       |             |              | 71.4  |             |              |           |             |              |       |
| SA0.5C1     | f1 |             |              |       |             |              | 3.0   |             |              |       | 5.4         | 21.3         |       |             |              |           |             |              |       |
|             | f2 |             |              |       |             |              | 85.6  |             |              |       | 77.1        | 48.5         |       |             |              |           |             |              |       |
| SA0.75C1    | f1 |             |              |       |             |              |       | 18.7        |              | 5.4   |             | 21.6         |       |             |              |           |             |              |       |
|             | f2 |             |              |       |             |              |       | 56.1        |              | 77.1  |             | 47.4         |       |             |              |           |             |              |       |
| SA1C1       | f1 |             |              |       |             |              |       |             | 8.5          | 21.3  | 21.6        |              |       |             |              |           |             |              |       |
|             | f2 |             |              |       |             |              |       |             | 71.4         | 48.5  | 47.4        |              |       |             |              |           |             |              |       |
| GM0.5M1     | f1 |             |              |       |             |              |       |             |              |       |             |              |       | 42.7        | 17.2         | 13.4      |             |              |       |
|             | f2 |             |              |       |             |              |       |             |              |       |             |              |       | 36.4        | 57.7         | 62.5      |             |              |       |
| GM0.75M1    | f1 |             |              |       |             |              |       |             |              |       |             |              |       | 42.7        |              | 89.1      |             | 81.6         |       |
|             | f2 |             |              |       |             |              |       |             |              |       |             |              |       | 36.4        |              | 32.1      |             | 34.0         |       |

|          |    |      |      |      |      |      |
|----------|----|------|------|------|------|------|
| GM1M1    | f1 | 17.2 | 89.1 |      |      | 65.1 |
|          | f2 | 57.7 | 32.1 |      |      | 23.7 |
| GM0.5C1  | f1 | 13.4 |      |      | 12.4 | 67.0 |
|          | f2 | 62.5 |      |      | 58.8 | 24.1 |
| GM0.75C1 | f1 |      | 81.6 |      | 12.4 | 69.9 |
|          | f2 |      | 34.0 |      | 58.8 | 25.7 |
| GM1C1    | f1 |      |      | 65.1 | 67.0 | 69.9 |
|          | f2 |      |      | 23.7 | 24.1 | 25.7 |
